# Supplementary material for: 382 在宅高齢者の転倒予防自己効力感に関する検討 : 家族との意識の相違に対する分析(生活環境支援系理学療法6, 第42回日本理学療法学術大会)
Source: Royal Society of Chemistry journal article supplement (doi:10.1039/d0cp06684b), 2007-04-20
Supplement: d0cp06684b1.pdf [file d0cp06684b1.pdf]

## Supplementary Materials

# Me-graphane: tailoring the structural and electronic properties of Me-graphene via hydrogenation

Enesio Marinho Jr. <sup>1,\*</sup> and Pedro A. S. Autreto <sup>1,†</sup>

<sup>1</sup>*Centro de Ciências Naturais e Humanas,  
Universidade Federal do ABC (UFABC),  
Avenida dos Estados 5001, 09210-580 Santo André, São Paulo, Brazil*

---

\* [enesio.junior@ufabc.edu.br](mailto:enesio.junior@ufabc.edu.br)

† [pedro.autreto@ufabc.edu.br](mailto:pedro.autreto@ufabc.edu.br)

## I. ORBITAL PROJECTED BAND STRUCTURES

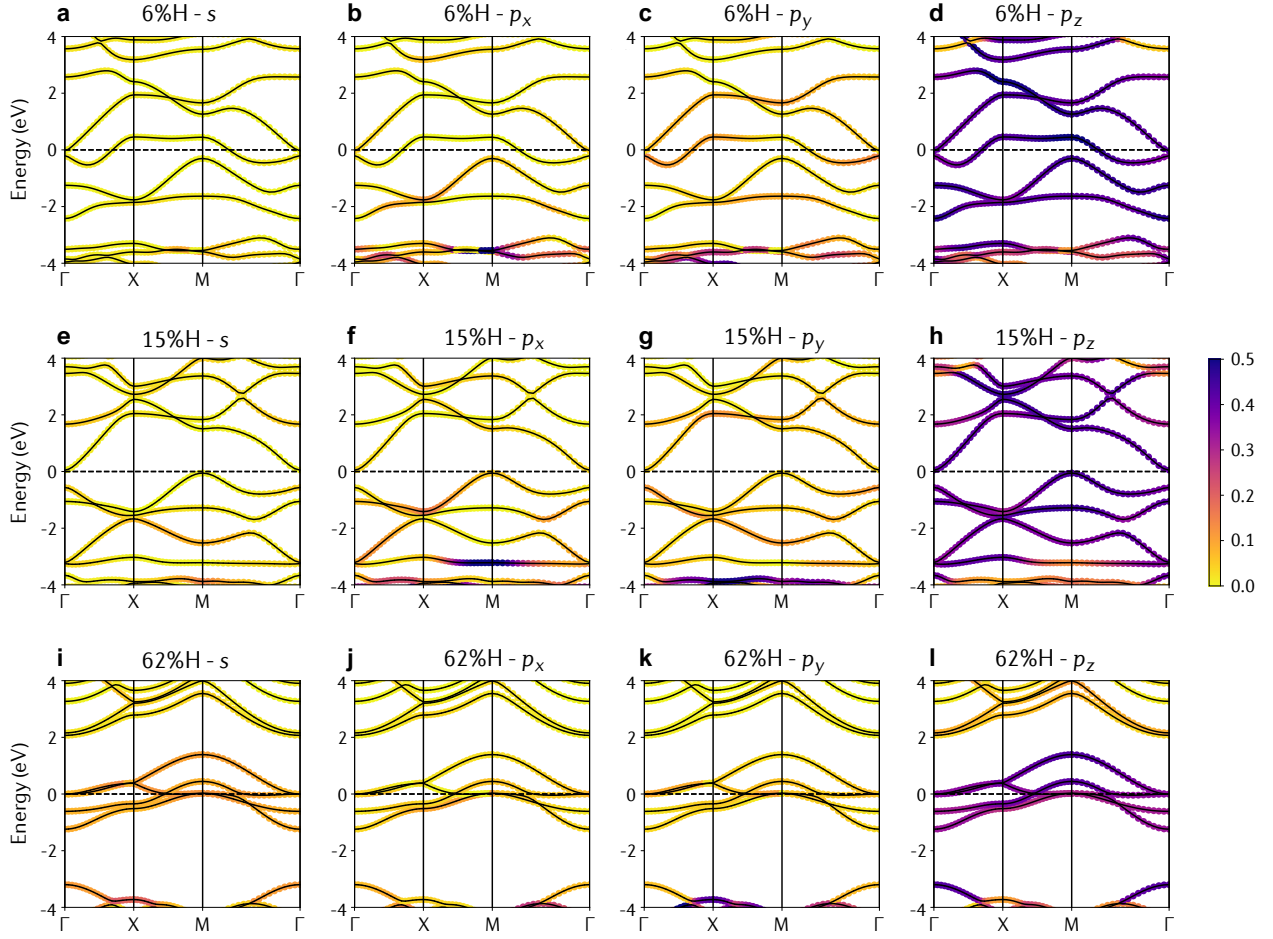

FIG. S1. Orbital-resolved band structures for (a-d) 6%, (e-h) 15%, and (i-l) 62%-hydrogenated Me-graphene (the scale indicates the magnitude of the projection). The orbitals  $s$ ,  $p_x$ ,  $p_y$  and  $p_z$  are projected onto the electronic bands. The zero energy is the Fermi level.

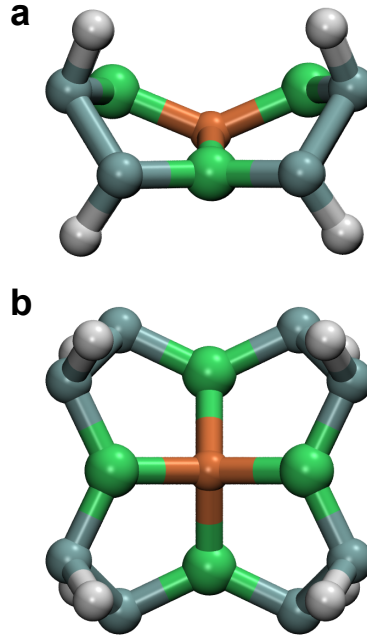

FIG. S2. Relaxed structure of 62%-hydrogenated Me-graphene: (a) side and (b) top view. We describe three carbon-atom sites:  $C_1$  ( $sp^3$ ) in orange,  $C_2/C_2'$  ( $sp^2$ ) in green and  $C_3/C_3'$  ( $sp^2$ ) in blue.

## II. REACTIVE MOLECULAR DYNAMICS

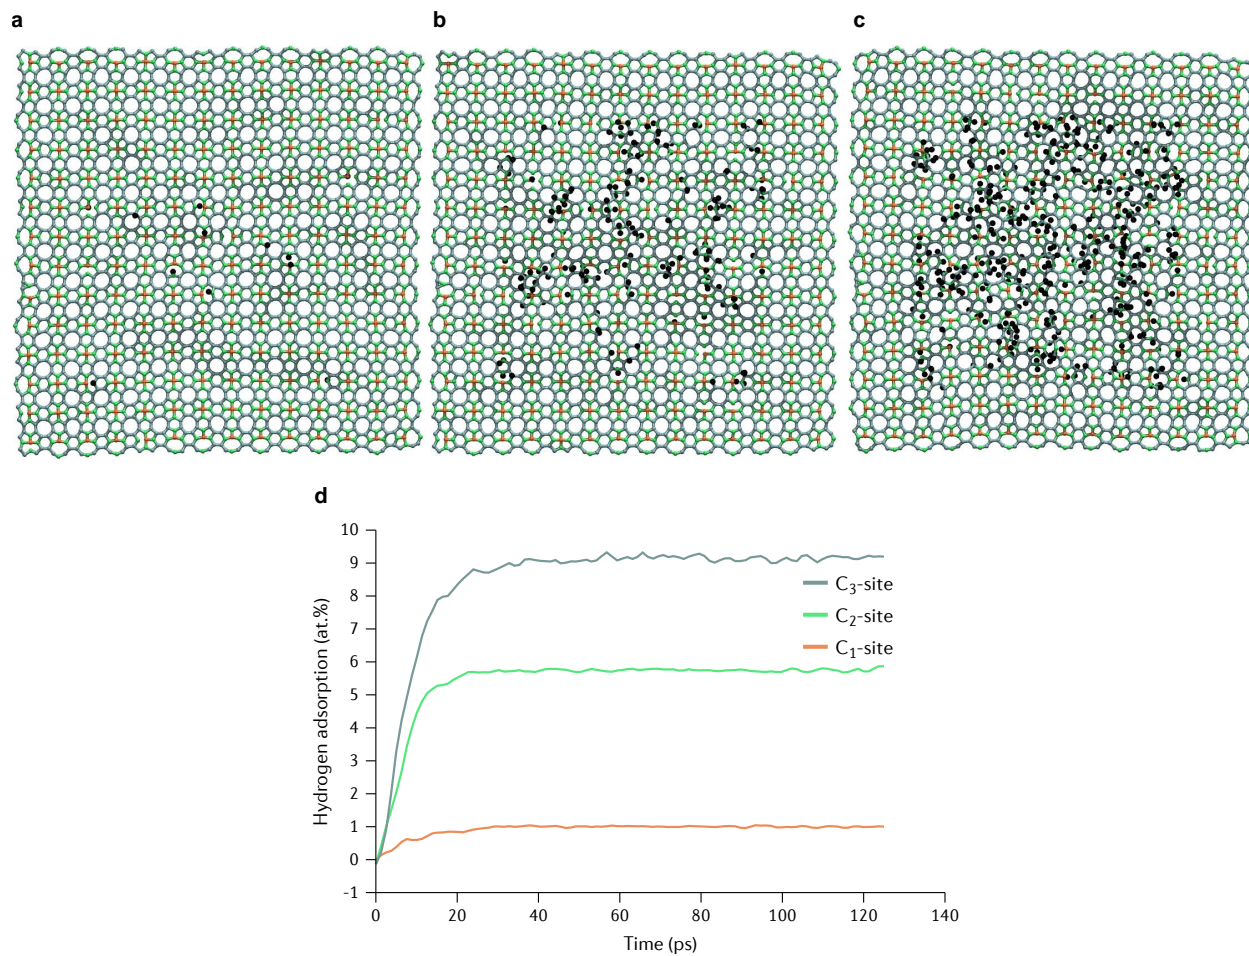

FIG. S3. Representative snapshots from the reactive molecular dynamics simulations of hydrogen incorporation process, where black spheres represent H atoms. (a) Early stage, (b) intermediate stage, and (c) final stage of the H adsorption dynamics at 800 K. (d) Hydrogen adsorption rate in atomic percent as a function of reaction time at 800 K, regarding the adsorption sites C<sub>1</sub>, C<sub>2</sub>, and C<sub>3</sub>.
